# Supplementary material for: Retinal Adaptation to Changing Glycemic Levels in a Rat Model of Type 2 Diabetes
Source: PubMed Central journal article supplement (PMC3568153; doi:10.1371/journal.pone.0055456), 2013-02-08
Supplement: pone.0055456.s002.pdf [file pone.0055456.s002.pdf]

**Table S1. Scotopic a-wave data.****(A) Scotopic a-wave implicit times**

| Intensity     | -1.0     |                   |                    | 0.0      |                   |                    | 0.5      |                   |                   | 1.0      |          |          |
|---------------|----------|-------------------|--------------------|----------|-------------------|--------------------|----------|-------------------|-------------------|----------|----------|----------|
|               | Lean     | ZDF               | ZDF-i              | Lean     | ZDF               | ZDF-i              | Lean     | ZDF               | ZDF-i             | Lean     | ZDF      | ZDF-i    |
| <b>Group:</b> | Lean     | ZDF               | ZDF-i              | Lean     | ZDF               | ZDF-i              | Lean     | ZDF               | ZDF-i             | Lean     | ZDF      | ZDF-i    |
| <b>Age</b>    |          |                   |                    |          |                   |                    |          |                   |                   |          |          |          |
| 8             | 19.7±0.6 | 20±0.4            |                    | 17.1±0.4 | 16.7±1.0          |                    | 11.6±0.7 | 11.6±0.4          |                   | 10.4±0.5 | 10.4±0.3 |          |
| 10            | 19.1±0.2 | <b>19.7±0.4 *</b> |                    | 16.9±0.3 | 17.1±0.5          |                    | 11.4±0.2 | 11.7±0.4          |                   | 10.3±0.3 | 10.5±0.3 |          |
| 12            | 19.7±0.6 | <b>20.1±0.5 *</b> |                    | 17.1±0.4 | 17.3±0.6          |                    | 11.5±0.4 | 11.9±0.4          |                   | 10.4±0.3 | 10.7±0.4 |          |
| 14            | 18.7±0.6 | <b>19.9±0.5 *</b> |                    | 16.5±0.6 | 16.9±0.7          |                    | 11.8±1.9 | 11.7±0.4          |                   | 10.4±0.9 | 10.4±0.3 |          |
| 16            | 18.5±0.6 | <b>20.1±0.3 *</b> | <b>19.6±0.4 †#</b> | 16.3±0.5 | 16.2±1.2          | <b>17.1±0.4 †#</b> | 11.1±0.7 | 11.4±0.3          | 11.7±0.4          | 10.1±0.6 | 10.2±0.3 | 10.7±0.6 |
| 19            | 18.5±0.4 | <b>20.2±0.4 *</b> | <b>19.5±0.6 †#</b> | 16.2±0.4 | <b>17.2±0.8 *</b> | <b>16.9±0.5 †</b>  | 10.9±0.5 | <b>11.7±0.3 *</b> | <b>12.4±1.7 †</b> | 9.8±0.4  | 10.5±0.4 | 10.5±0.4 |
| 22            | 18.7±0.2 | <b>21.0±0.3 *</b> | <b>19.9±0.6 †#</b> | 16.5±0.3 | <b>17.9±0.8 *</b> | <b>17.4±0.6 †</b>  | 11.1±0.4 | <b>12.2±0.3 *</b> | 14.0±1.9          | 10.2±0.3 | 10.8±0.3 | 11.2±0.3 |

**(B) Scotopic a-wave amplitudes**

| Intensity     | -1.0   |                 |                | 0.0     |                 |                 | 0.5     |                 |                 | 1.0     |                 |                 |
|---------------|--------|-----------------|----------------|---------|-----------------|-----------------|---------|-----------------|-----------------|---------|-----------------|-----------------|
|               | Lean   | ZDF             | ZDF-i          | Lean    | ZDF             | ZDF-i           | Lean    | ZDF             | ZDF-i           | Lean    | ZDF             | ZDF-i           |
| <b>Group:</b> | Lean   | ZDF             | ZDF-i          | Lean    | ZDF             | ZDF-i           | Lean    | ZDF             | ZDF-i           | Lean    | ZDF             | ZDF-i           |
| <b>Age</b>    |        |                 |                |         |                 |                 |         |                 |                 |         |                 |                 |
| 8             | 135±24 | 120±33          |                | 428±42  | 426±67          |                 | 523±57  | 525±80          |                 | 595±57  | 592±72          |                 |
| 10            | 106±31 | 123±25          |                | 389±62  | 423±56          |                 | 459±69  | 520±62          |                 | 523±86  | 582±74          |                 |
| 12            | 107±42 | 125±35          |                | 365±55  | <b>452±75 *</b> |                 | 425±96  | <b>558±87 *</b> |                 | 528±54  | <b>628±90 *</b> |                 |
| 14            | 108±48 | 136±32          |                | 372±105 | 451±68          |                 | 440±113 | <b>551±66 *</b> |                 | 497±109 | <b>626±69 *</b> |                 |
| 16            | 106±29 | <b>166±28 *</b> | <b>98±30 #</b> | 348±53  | <b>494±62 *</b> | <b>360±61 #</b> | 413±70  | <b>618±69 *</b> | <b>411±74 #</b> | 468±78  | <b>690±82 *</b> | <b>472±92 #</b> |
| 19            | 121±30 | 128±26          | <b>96±26 #</b> | 395±46  | <b>449±48 *</b> | <b>381±64 #</b> | 461±41  | <b>544±56 *</b> | <b>420±55 #</b> | 517±52  | <b>616±56 *</b> | <b>480±58 #</b> |
| 22            | 108±20 | 129±23          | <b>82±22 #</b> | 372±38  | <b>474±47 *</b> | <b>324±59 #</b> | 434±37  | <b>558±58 *</b> | <b>362±78 #</b> | 487±36  | <b>627±66 *</b> | <b>422±86 #</b> |

**(C) Maximal scotopic a-wave slope**

| Intensity     | -1.0     |          |          | 0.0       |                    |                     | 0.5        |                    |                     | 1.0        |                     |                      |
|---------------|----------|----------|----------|-----------|--------------------|---------------------|------------|--------------------|---------------------|------------|---------------------|----------------------|
|               | Lean     | ZDF      | ZDF-i    | Lean      | ZDF                | ZDF-i               | Lean       | ZDF                | ZDF-i               | Lean       | ZDF                 | ZDF-i                |
| <b>Group:</b> | Lean     | ZDF      | ZDF-i    | Lean      | ZDF                | ZDF-i               | Lean       | ZDF                | ZDF-i               | Lean       | ZDF                 | ZDF-i                |
| <b>Age</b>    |          |          |          |           |                    |                     |            |                    |                     |            |                     |                      |
| 8             | -8.9±2.3 | -7.6±2.3 |          | -22.7±4.1 | -22.8±4.4          |                     | -43.0±7.4  | -43.4±8.0          |                     | -61.8±8.6  | -62.4±10.0          |                      |
| 10            | -8.3±1.8 | -7.8±1.8 |          | -19.8±3.2 | -22.1±3.1          |                     | -37.9±6.5  | -41.9±5.7          |                     | -54.0±9.1  | -60.1±7.1           |                      |
| 12            | -7.4±2.1 | -7.7±1.7 |          | -19.1±4.3 | <b>-23.4±5.3 *</b> |                     | -37.3±8.4  | <b>-44.8±8.9 *</b> |                     | -55.9±9.0  | <b>-64.3±11.4 *</b> |                      |
| 14            | -8.5±3.2 | -7.9±2.1 |          | -20.3±6.1 | -22.5±4.0          |                     | -38.1±10.9 | -43.1±6.3          |                     | -53.5±14.0 | <b>-62.6±8.9 *</b>  |                      |
| 16            | -9.0±4.5 | -9.8±1.8 | -6.9±2.0 | -18.8±3.8 | <b>-28.1±3.0 *</b> | <b>-17.4±4.5 #</b>  | -35.3±7.1  | <b>-52.3±6.1 *</b> | <b>-33.6±8.7 #</b>  | -49.8±9.4  | <b>-73.5±8.9 *</b>  | <b>-48.3±11.6 #</b>  |
| 19            | -9.2±2.8 | -7.2±1.3 | -6.7±2.0 | -21.6±4.0 | -22.6±3.2          | <b>-16.4±4.4 †#</b> | -41.0±6.6  | -43.4±5.7          | <b>-32.5±7.5 †#</b> | -57.1±7.9  | -62.7±7.1           | <b>-48.5±10.4 †#</b> |
| 22            | -8.4±2.0 | -7.5±1.6 | -6.9±1.3 | -19.6±2.4 | -22.4±3.2          | <b>-14.2±3.7 †#</b> | -37.4±4.8  | -42.5±5.1          | <b>-28.0±6.6 †#</b> | -54.2±9.5  | <b>-62.9±6.1 *</b>  | <b>-40.3±10.0 †#</b> |

Units for intensity denoted as log cd\*s/m<sup>2</sup>; Data presented are group mean ±SD (see Table 1 for number of animals in each group at various ages); Implicit times (A) denoted in ms; Amplitude (B) denoted in μV; Slope (C) denoted in μV/0.4 ms; Age denoted in weeks.

ZDF, Zucker Diabetic Fatty rats; Lean, congenic control rats; ZDF-i, insulin treated ZDF

\* p<0.05 between Lean and ZDF

† p<0.05 between Lean and ZDF-i

# p<0.05 between ZDF and ZDF-i
