# Supplementary material for: Retinal Adaptation to Changing Glycemic Levels in a Rat Model of Type 2 Diabetes
Source: PubMed Central journal article supplement (PMC3568153; doi:10.1371/journal.pone.0055456), 2013-02-08
Supplement: pone.0055456.s004.pdf [file pone.0055456.s004.pdf]

**Table S3. Scotopic b-wave implicit time data.**

**Scotopic b-wave implicit times**

| Intensity  | -3.7     |                   |                   | -3.0     |                   |                    | -2.0     |                   |                   | -1.0     |                   |                   |
|------------|----------|-------------------|-------------------|----------|-------------------|--------------------|----------|-------------------|-------------------|----------|-------------------|-------------------|
|            | Lean     | ZDF               | ZDF-i             | Lean     | ZDF               | ZDF-i              | Lean     | ZDF               | ZDF-i             | Lean     | ZDF               | ZDF-i             |
| <b>Age</b> |          |                   |                   |          |                   |                    |          |                   |                   |          |                   |                   |
| 8          | 88.7±3.5 | 89.4±3.9          |                   | 84.7±2.5 | 85.1±3.0          |                    | 68.6±1.9 | 70.1±3.3          |                   | 50.7±1.1 | 51.3±1.3          |                   |
| 10         | 88.3±3.0 | 88.7±3.1          |                   | 82.2±2.9 | 84.5±2.8          |                    | 69.5±2.3 | 70.1±2.9          |                   | 50.9±1.1 | 50.9±1.5          |                   |
| 12         | 88.4±4.5 | <b>92.9±3.9 *</b> |                   | 85.9±2.3 | 86.2±3.0          |                    | 70.7±3.7 | 71.4±2.9          |                   | 51.6±1.9 | 51.4±1.2          |                   |
| 14         | 85.5±2.9 | <b>91.3±2.8 *</b> |                   | 83.5±2.8 | <b>86.4±3.2 *</b> |                    | 67.9±5.4 | 69.0±2.7          |                   | 51.7±3.6 | 51.1±1.7          |                   |
| 16         | 86.6±5.3 | <b>94.4±4.4 *</b> | <b>89.5±1.6 #</b> | 82.8±3.9 | <b>87.2±5.0 *</b> | <b>87.0±1.4 †</b>  | 67.7±4.4 | 68.7±5.2          | 69.9±2.6          | 48.3±1.3 | <b>51.6±1.7 *</b> | <b>51.3±1.8 †</b> |
| 19         | 83.7±3.1 | <b>92.2±4.3 *</b> | <b>89.0±4.4 †</b> | 83.0±2.8 | 86.0±3.7          | <b>86.3±4.3 †</b>  | 66.4±3.4 | 69.4±2.4          | 69.6±2.8          | 48.8±1.6 | 50.4±0.9          | 49.2±3.5          |
| 22         | 86.2±2.3 | <b>93.9±2.7 *</b> | <b>88.5±3.5 #</b> | 82.3±2.7 | <b>89.9±3.9 *</b> | <b>82.1±7.2 #</b>  | 67.8±2.0 | 72.4±3.0          | 68.7±2.9          | 49.4±1.7 | <b>52.7±2.0 *</b> | <b>50.6±1.1 #</b> |
|            |          |                   |                   |          |                   |                    |          |                   |                   |          |                   |                   |
|            | 0.0      |                   |                   | 0.5      |                   |                    | 1.0      |                   |                   |          |                   |                   |
|            | Lean     | ZDF               | ZDF-i             | Lean     | ZDF               | ZDF-i              | Lean     | ZDF               | ZDF-i             |          |                   |                   |
| 8          | 51.4±2.1 | 51.6±2.1          |                   | 50.6±1.9 | 50.8±1.5          |                    | 51.0±1.8 | 51.4±1.4          |                   |          |                   |                   |
| 10         | 53.1±2.6 | <b>50.9±1.5 *</b> |                   | 51.3±2.4 | 51.1±1.9          |                    | 51.5±2.4 | 51.5±1.5          |                   |          |                   |                   |
| 12         | 52.8±1.4 | 50.9±1.5          |                   | 51.8±1.4 | 50.7±1.8          |                    | 52.9±1.7 | 51.5±1.6          |                   |          |                   |                   |
| 14         | 54.0±2.1 | <b>50.8±1.7 *</b> |                   | 51.8±2.2 | 50.9±1.7          |                    | 51.2±2.0 | 51.9±1.6          |                   |          |                   |                   |
| 16         | 50.0±4.3 | 50.9±2.7          | 52.0±1.9          | 49.8±5.0 | 50.7±3.0          | 51.5±1.3           | 48.6±3.6 | <b>52.1±3.2 *</b> | <b>52.6±1.2 †</b> |          |                   |                   |
| 19         | 48.0±1.6 | <b>50.4±1.0 *</b> | <b>52.2±2.5 †</b> | 47.5±1.7 | <b>50.4±1.3 *</b> | <b>52.8±2.9 †#</b> | 48.1±1.8 | <b>51.7±1.5 *</b> | <b>52.9±2.4 †</b> |          |                   |                   |
| 22         | 50.2±3.1 | <b>52.8±2.2 *</b> | <b>53.9±2.1 †</b> | 49.1±2.0 | <b>53.1±2.4 *</b> | <b>52.6±1.3 †</b>  | 49.5±2.0 | 50.5±6.0          | <b>53.2±1.6 †</b> |          |                   |                   |

Units for intensity denoted as log cd\*s/m<sup>2</sup>; Data presented are group mean ±SD (see Table 1 for number of animals in each group at various ages); Implicit times denoted in ms; Age denoted in weeks.

ZDF, Zucker Diabetic Fatty rats; Lean, congenic control rats; ZDF-i, insulin treated ZDF

\* p<0.05 between Lean and ZDF

† p<0.05 between Lean and ZDF-i

# p<0.05 between ZDF and ZDF-i
