# Supplementary material for: Retinal Adaptation to Changing Glycemic Levels in a Rat Model of Type 2 Diabetes
Source: PubMed Central journal article supplement (PMC3568153; doi:10.1371/journal.pone.0055456), 2013-02-08
Supplement: pone.0055456.s005.pdf [file pone.0055456.s005.pdf]

**Table S4. Scotopic oscillatory potential amplitudes.**

**Scotopic OP amplitude/maximal a-wave slope**

| OP number: | 1        |                   |                    | 2        |          |          |
|------------|----------|-------------------|--------------------|----------|----------|----------|
|            | Lean     | ZDF               | ZDF-i              | Lean     | ZDF      | ZDF-i    |
| <b>Age</b> |          |                   |                    |          |          |          |
| 8          | 13.6±0.8 | 11.0±1.2          |                    | 41.6±2.3 | 38.3±4.4 |          |
| 10         | 13.5±1.2 | 10.8±1.1          |                    | 39.2±2.1 | 37.7±3.0 |          |
| 12         | 12.8±2.5 | 9.7±1.5           |                    | 38.8±6.7 | 35.2±5.1 |          |
| 14         | 13.9±2.1 | 9.9±1.4           |                    | 38.5±5.9 | 37.1±5.1 |          |
| 16         | 14.5±1.8 | 9.3±1.3           | 13.7±2.3           | 40.5±5.7 | 34.2±4.0 | 42.6±6.4 |
| 19         | 14.0±1.7 | 11.7±1.5          | 14.9±2.5           | 38.2±3.0 | 41.1±4.2 | 44.4±8.0 |
| 22         | 13.5±2.3 | 10.7±2.0          | 14.9±3.4           | 37.8±5.0 | 37.7±7.1 | 46.3±5.3 |
|            |          |                   |                    |          |          |          |
|            | 3        |                   |                    | 4        |          |          |
|            | Lean     | ZDF               | ZDF-i              | Lean     | ZDF      | ZDF-i    |
| 8          | 18.3±2.8 | 18.4±3.0          |                    | 3.8±0.4  | 3.5±0.4  |          |
| 10         | 15.9±2.3 | 17.7±2.5          |                    | 3.4±0.4  | 3.5±0.4  |          |
| 12         | 16.5±4.3 | 17.4±2.6          |                    | 3.4±0.8  | 3.3±0.5  |          |
| 14         | 16.5±3.9 | <b>19.5±3.2</b> * |                    | 3.5±0.6  | 3.8±0.7  |          |
| 16         | 20.7±3.5 | <b>17.7±4.0</b> * | 19.8±3.3           | 3.8±0.6  | 3.5±1.1  | 4.2±0.7  |
| 19         | 18.7±2.5 | 21.5±3.0          | 20.4±4.9           | 3.8±0.5  | 4.1±0.6  | 3.9±0.7  |
| 22         | 17.4±3.2 | 18.8±3.5          | <b>24.1±4.3</b> †# | 3.8±0.5  | 3.8±0.5  | 4.3±1.1  |

Responses elicited by intensity of 0.0 log cd\*s/m<sup>2</sup>; Data presented are group mean ±SD (see Table 1 for number of animals in each group at various ages); Age denoted in weeks.

OP, oscillatory potential; ZDF, Zucker Diabetic Fatty rats; Lean, congenic control rats; ZDF-i, insulin treated ZDF

\* p<0.05 between Lean and ZDF

† p<0.05 between Lean and ZDF-i

# p<0.05 between ZDF and ZDF-i
