# Supplementary material for: Retinal Adaptation to Changing Glycemic Levels in a Rat Model of Type 2 Diabetes
Source: PLoS One. 2013 Feb 8;8(2):e55456. doi: 10.1371/journal.pone.0055456 (PMC3568153; doi:10.1371/journal.pone.0055456)
Supplement: Table S2 — Scotopic b-wave amplitude data. Units for intensity denoted as log cd*s/m2; Data presented are group mean ±SD (see Table 1 for number of animals in each group at various ages); Amplitude denoted in µV; Age denoted in weeks. (PDF) [file pone.0055456.s003.pdf]

**Table S2. Scotopic b-wave amplitude data.**

**(A) Scotopic b-wave amplitudes**

| Intensity | -3.7     |                   |                    | -3.0     |                   |                    | -2.0     |                   |                    | -1.0     |                   |                   |
|-----------|----------|-------------------|--------------------|----------|-------------------|--------------------|----------|-------------------|--------------------|----------|-------------------|-------------------|
| Group:    | Lean     | ZDF               | ZDF-i              | Lean     | ZDF               | ZDF-i              | Lean     | ZDF               | ZDF-i              | Lean     | ZDF               | ZDF-i             |
| Age       |          |                   |                    |          |                   |                    |          |                   |                    |          |                   |                   |
| 8         | 496±99   | 442±117           |                    | 894±191  | 881±155           |                    | 1249±210 | 1288±164          |                    | 1274±121 | 1284±153          |                   |
| 10        | 405±127  | 427±116           |                    | 812±186  | 884±154           |                    | 1200±206 | 1296±112          |                    | 1188±203 | 1266±92           |                   |
| 12        | 391±100  | 430±108           |                    | 789±142  | 898±146           |                    | 1177±132 | <b>1314±125 *</b> |                    | 1153±117 | <b>1263±117 *</b> |                   |
| 14        | 393±138  | 464±118           |                    | 798±235  | 931±145           |                    | 1136±235 | <b>1293±131 *</b> |                    | 1121±200 | <b>1242±119 *</b> |                   |
| 16        | 366±94   | 495±143           | 401±63             | 761±130  | 986±151           | 839±123            | 1143±166 | <b>1361±115 *</b> | <b>1195±155 #</b>  | 1143±152 | <b>1319±123 *</b> | <b>1164±143 #</b> |
| 19        | 399±117  | 434±51            | 348±104            | 804±123  | 890±49            | 748±160            | 1173±95  | 1275±85           | <b>1104±129 #</b>  | 1156±89  | 1217±68           | <b>1067±92 †#</b> |
| 22        | 379±109  | 387±92            | 254±85             | 696±86   | 798±98            | 616±134            | 1102±103 | 1226±88           | <b>989±164 †#</b>  | 1091±99  | 1131±91           | <b>1003±52 †#</b> |
|           | 0.0      |                   |                    | 0.5      |                   |                    | 1.0      |                   |                    |          |                   |                   |
|           | Lean     | ZDF               | ZDF-i              | Lean     | ZDF               | ZDF-i              | Lean     | ZDF               | ZDF-i              |          |                   |                   |
| 8         | 1587±112 | 1589±161          |                    | 1628±125 | 1636±174          |                    | 1610±117 | 1618±157          |                    |          |                   |                   |
| 10        | 1461±243 | 1566±114          |                    | 1492±257 | 1610±145          |                    | 1453±256 | <b>1605±109 *</b> |                    |          |                   |                   |
| 12        | 1410±118 | <b>1580±146 *</b> |                    | 1489±133 | <b>1649±153 *</b> |                    | 1469±144 | <b>1640±146 *</b> |                    |          |                   |                   |
| 14        | 1408±237 | <b>1537±138 *</b> |                    | 1436±208 | <b>1576±134 *</b> |                    | 1418±178 | <b>1569±113 *</b> |                    |          |                   |                   |
| 16        | 1400±191 | <b>1651±147 *</b> | <b>1392±179 #</b>  | 1449±203 | <b>1714±153 *</b> | <b>1402±183 #</b>  | 1426±187 | <b>1667±164 *</b> | <b>1357±183 #</b>  |          |                   |                   |
| 19        | 1421±83  | 1534±95           | <b>1329±130 †#</b> | 1529±124 | 1590±100          | <b>1365±145 †#</b> | 1413±68  | 1554±101          | <b>1302±102 †#</b> |          |                   |                   |
| 22        | 1355±71  | 1458±102          | <b>1265±85 †#</b>  | 1453±79  | 1487±113          | <b>1273±90 †#</b>  | 1379±71  | 1481±122          | <b>1227±78 †#</b>  |          |                   |                   |

**(B) Scotopic b/a amplitude ratio**

| Intensity | -1.0     |          |          | 0.0     |                  |                  | 0.5     |                  |                  | 1.0     |                  |                   |
|-----------|----------|----------|----------|---------|------------------|------------------|---------|------------------|------------------|---------|------------------|-------------------|
| Group:    | Lean     | ZDF      | ZDF-i    | Lean    | ZDF              | ZDF-i            | Lean    | ZDF              | ZDF-i            | Lean    | ZDF              | ZDF-i             |
| Age       |          |          |          |         |                  |                  |         |                  |                  |         |                  |                   |
| 8         | 9.6±1.2  | 11.4±2.8 |          | 3.7±0.1 | 3.8±0.3          |                  | 3.1±0.1 | 3.1±0.3          |                  | 2.7±0.1 | 2.7±0.2          |                   |
| 10        | 12.0±3.3 | 10.6±1.9 |          | 3.8±0.3 | 3.7±0.3          |                  | 3.2±0.2 | 3.1±0.2          |                  | 2.8±0.1 | 2.8±0.3          |                   |
| 12        | 12.5±5.9 | 10.5±1.8 |          | 3.9±0.4 | <b>3.5±0.3 *</b> |                  | 3.2±0.2 | 3.0±0.2          |                  | 2.8±0.2 | 2.6±0.2          |                   |
| 14        | 10.0±1.6 | 9.9±1.7  |          | 3.7±0.2 | <b>3.5±0.2 *</b> |                  | 3.2±0.2 | <b>2.9±0.2 *</b> |                  | 2.8±0.1 | <b>2.5±0.2 *</b> |                   |
| 16        | 11.4±3.0 | 8.1±1.3  | 12.8±3.7 | 4.0±0.2 | <b>3.4±0.3 *</b> | <b>3.9±0.3 #</b> | 3.5±0.3 | <b>2.8±0.1 *</b> | <b>3.4±0.4 #</b> | 3.1±0.2 | <b>2.4±0.2 *</b> | <b>2.9±0.3 #</b>  |
| 19        | 10.4±2.3 | 9.8±1.7  | 11.8±2.9 | 3.8±0.2 | <b>3.4±0.2 *</b> | 3.5±0.3          | 3.3±0.1 | <b>2.9±0.2 *</b> | <b>3.3±0.2 #</b> | 2.9±0.2 | <b>2.5±0.2 *</b> | <b>2.7±0.2 †#</b> |
| 22        | 10.9±1.6 | 9.0±1.4  | 13.1±4.2 | 3.8±0.3 | <b>3.1±0.2 *</b> | <b>4.0±0.5 #</b> | 3.4±0.2 | <b>2.7±0.2 *</b> | <b>3.6±0.6 #</b> | 2.9±0.2 | <b>2.4±0.2 *</b> | <b>3.0±0.5 #</b>  |

Units for intensity denoted as log cd\*s/m<sup>2</sup>; Data presented are group mean ±SD (see Table 1 for number of animals in each group at various ages); Amplitude denoted in μV; Age denoted in weeks.

ZDF, Zucker Diabetic Fatty rats; Lean, congenic control rats; ZDF-i, insulin treated ZDF

\* p<0.05 between Lean and ZDF

† p<0.05 between Lean and ZDF-i

# p<0.05 between ZDF and ZDF-i
