# Supplementary material for: Retinal Adaptation to Changing Glycemic Levels in a Rat Model of Type 2 Diabetes
Source: PLoS One. 2013 Feb 8;8(2):e55456. doi: 10.1371/journal.pone.0055456 (PMC3568153; doi:10.1371/journal.pone.0055456)
Supplement: Table S5 — Photopic b-wave data. Units for intensity denoted as log cd*s/m2; Data presented are group mean ±SD (see Table 1 for number of animals in each group at various ages); Implicit times (A) denoted in ms; Amplitude (B) denoted in µV; Age denoted in weeks. (PDF) [file pone.0055456.s006.pdf]

### (A) Photopic b-wave implicit times

### (B) Photopic b-wave amplitudes

# p<0.05 between ZDF and ZDF-i
